# Supplementary material for: Inverted internal limiting membrane flap technique as a useful procedure for macular hole-associated retinal detachment in highly myopic eyes
Source: PubMed Central journal article supplement — Eye (Lond). 2016 Dec 2;31(4):545–50. doi: 10.1038/eye.2016.263 (PMC5395991; doi:10.1038/eye.2016.263), 2016-12-02

**Patient no.1**

VA=0.09 ILM peel  
beyond the arcade

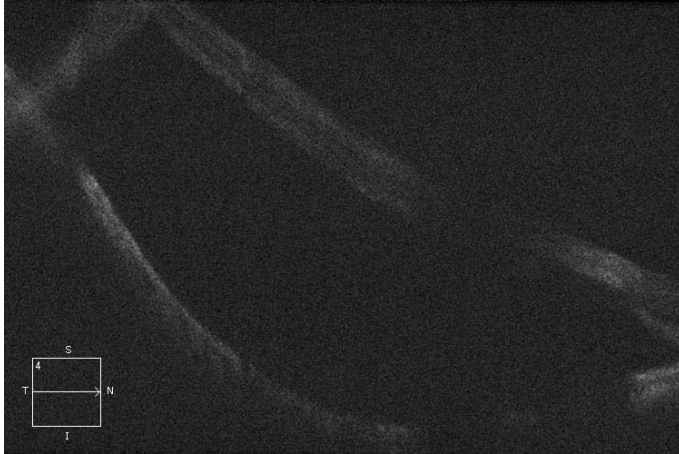

**Patient no.3**

VA=0.02 ILM peel  
beyond the arcade

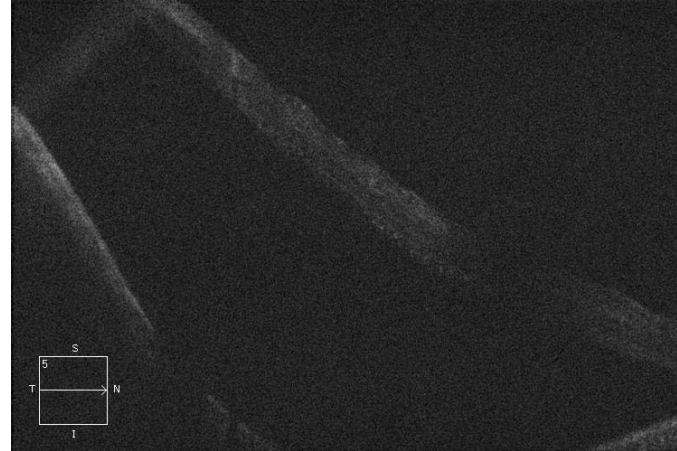

**Patient no.2**

VA=0.02 ILM flap  
beyond the arcade

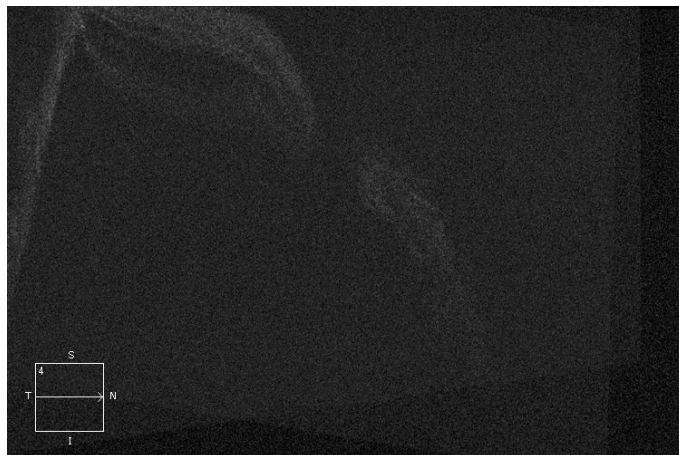

**Patient no.4**

VA=0.5 ILM peel  
beyond the arcade

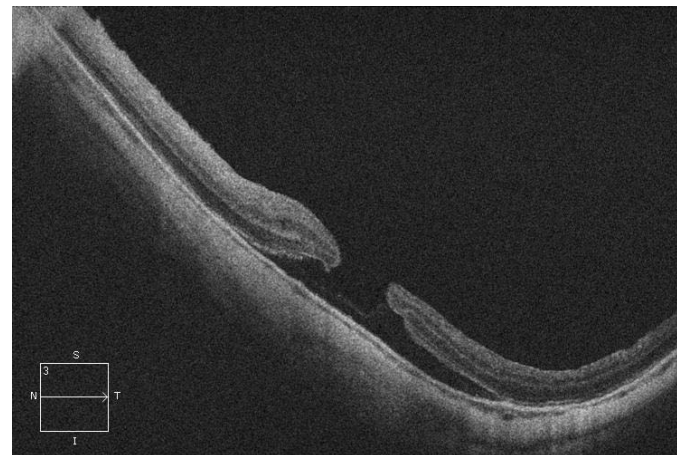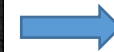

4week later

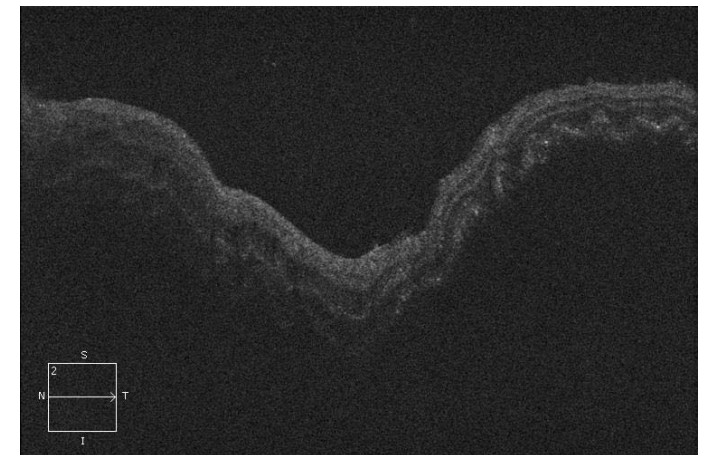

Patient no.5  
VA=0.04 ILM peel  
beyond the arcade

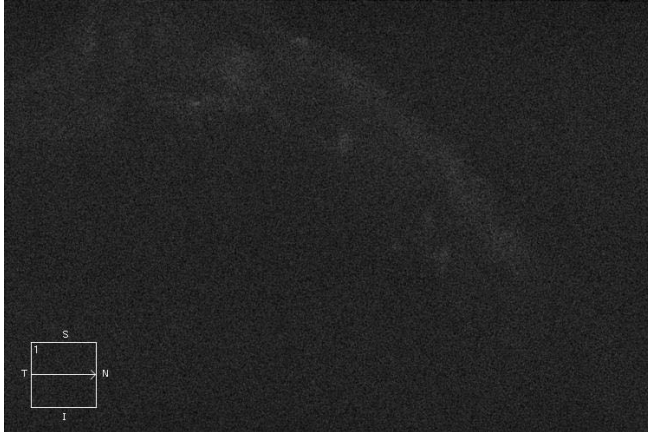

Patient no.7  
VA=0.3 ILM flap  
beyond the arcade

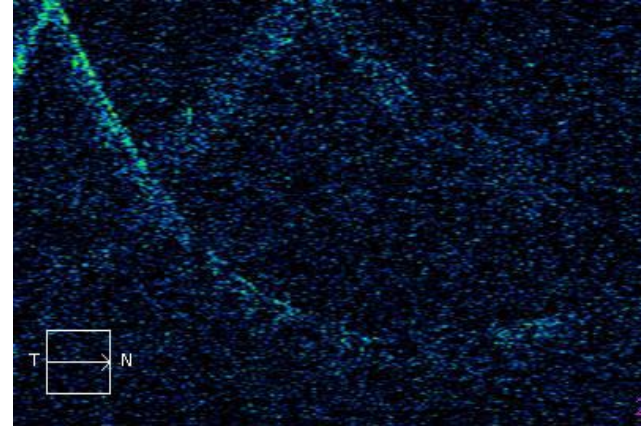

Patient no.6  
VA=0.03 ILM flap  
beyond the arcade

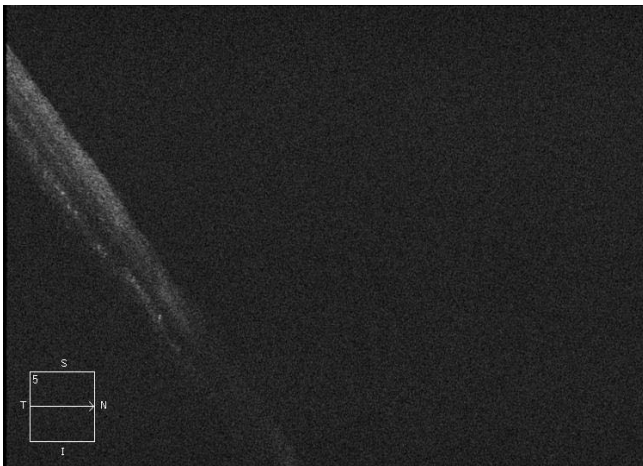

Patient no.8  
VA=0.5 ILM flap  
whitin the arcade

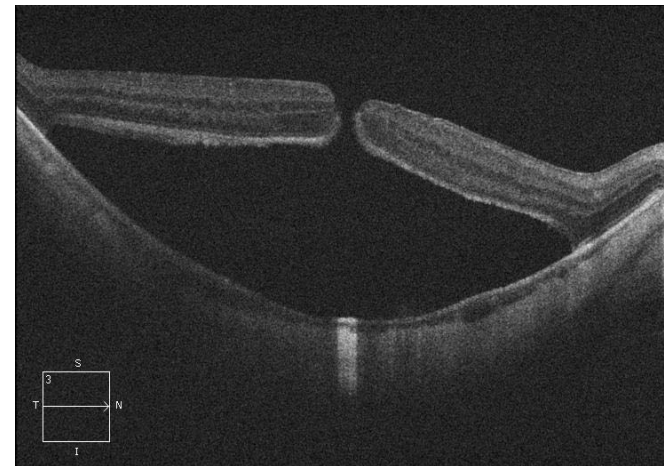

Patient no.9

VA=0.05 ILM peel  
beyond the arcade

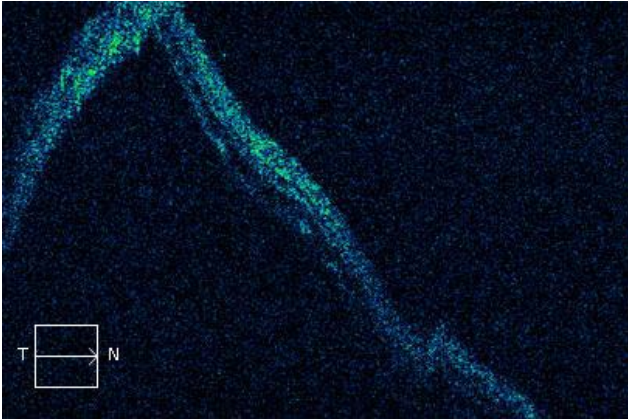

Patient no.11

VA=0.3 ILM peel  
within the arcade

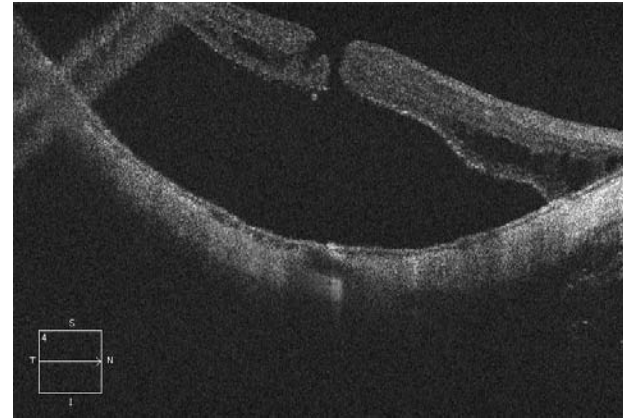

Patient no.10

VA=0.09 ILM peel  
within the arcade

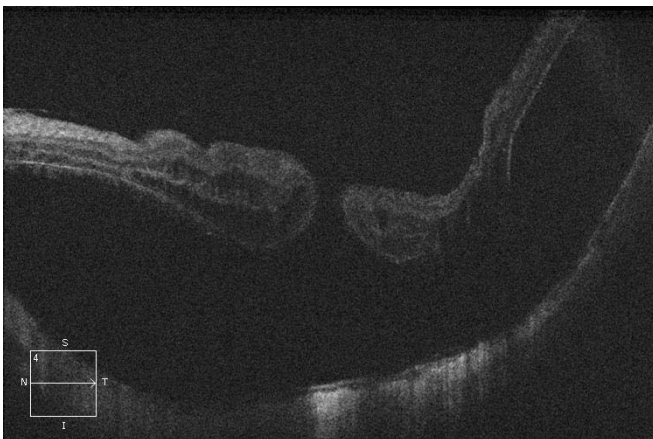

Patient no.12

VA=0.2 ILM peel  
within the arcade

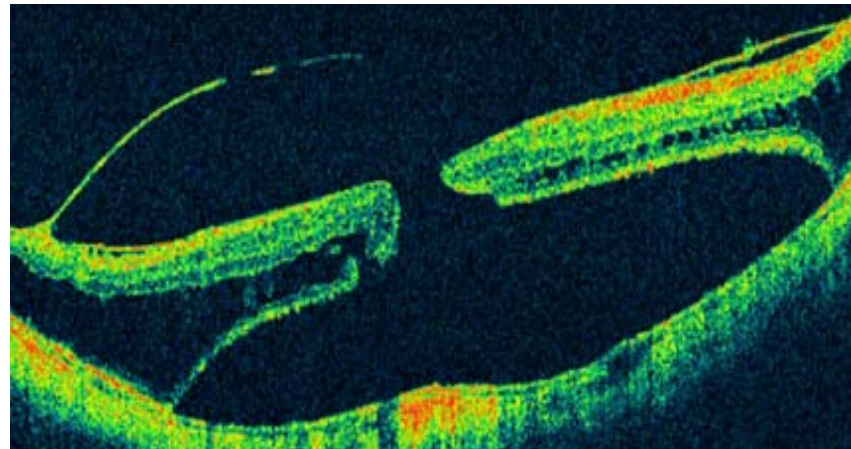

Patient no.13  
VA=0.06 ILM flap  
beyond the arcade

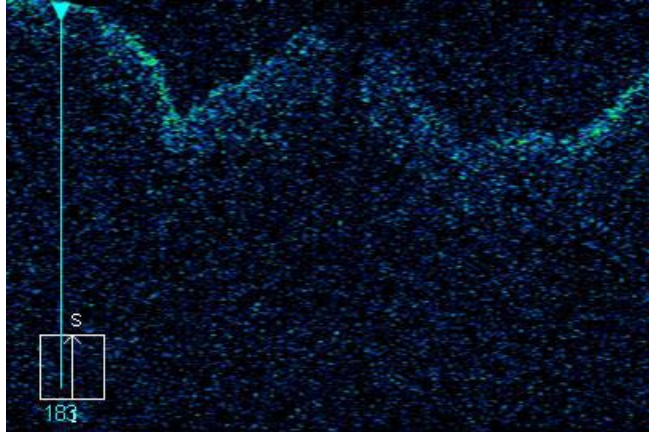

Patient no.15  
VA=0.1 ILM flap  
beyond the arcade

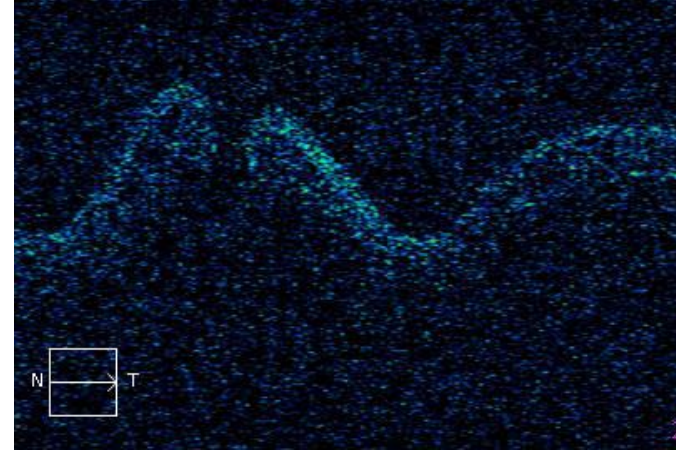

Patient no.14  
VA=0.1 ILM peel  
beyond the arcade

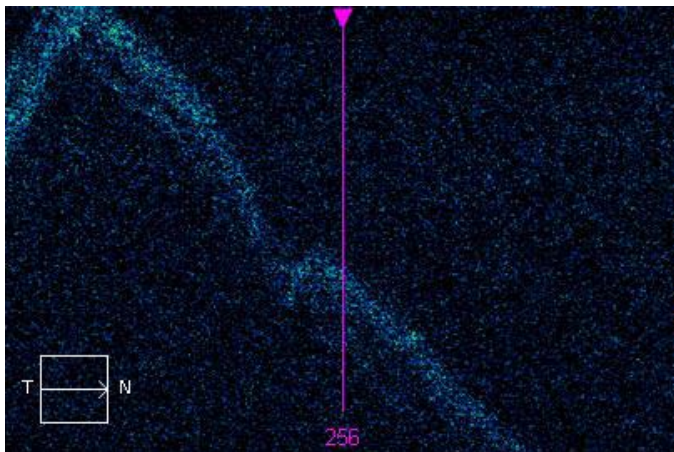

Supplement: eye2016263x1.pdf [file eye2016263x1.pdf]
